# Supplementary material for: Characterization of the secondary structure, renaturation and physical ageing of gelatine adhesives
Source: Research Square preprint supplement (doi:10.21203/rs.3.rs-5670377/v1), 2024-12-23
Supplement: Supplementary file 1 [file f424625987a655fa145f2245.docx]

**Supplementary material**

**Characterization of the secondary structure, renaturation and physical ageing of gelatine adhesives**

Elena Pulidoria, Celia Ducea*, Emilia Bramantib*, Leila Biroloc, Brunella Cipollettac, Laura Dello Ioiod, Ilaria Bonaducea

a Department of Chemistry and Industrial Chemistry, University of Pisa, Via G. Moruzzi 13, 56124 Pisa, Italy

b Institute of Chemistry of Organometallic Compounds, National Research Council, Via G. Moruzzi 1, 56124 Pisa, Italy

c Department of Chemical Sciences, University of Naples Federico II, Complesso Universitario di Monte S. Angelo, Via Cinthia 21, 80126, Naples, Italy

d Dello Ioio Restauri, Vico Equense, 80069, Naples, Italy

*Corresponding author

**Table of content**

- **Table S1.** Values of enthalpy relaxation and the peak temperature calculated at each time point using an annealing temperature of 40 °C and 30 °C.
- **Table S2a.** Glass transition temperature (*t*g) and associated heat capacity change (∆*Cp*) determined from the first and second heating scans, onset temperature (*t*onset), peak temperature (*t*peak), width signal expressed as the difference between the temperature at the start and end of the event (∆t), and enthalpy (∆*H*) calculated for the two signals observed in the first heating scan only.
- **Table S2b.** Glass transition temperature (*t*g)and associated heat capacity change (∆*C*p)determined from the first and second heating scans, onset temperature (*t*onset), peak temperature (*t*peak), width signal expressed as the difference between the temperature at the start and end of the event (∆*t*), and enthalpy (∆*H*) calculated for the signals observed in the first heating scan for samples with several overlapping signals.
- **Table S3.** Temperature (°C) and mass loss (% w/w) of each degradation step observed during the TGA carried out under nitrogen flow.
- **Table S4.** Second mass loss peak temperature (*t*max), maximum degradation rate (DTGmax) and width of the collagen degradation peak (Δonset-endset) obtained from TG and DTG curves recorded under nitrogen flow.
- **Figure S1.** ATR-FTIR spectra of collage, gelatine A, gelatine B, HP3, HP4, HP6, HP8, HM1, HM4, HM5, BM1, BM2, BM3, BM4, BM5 samples.
- **Figure S2.** DSC curves obtained during the second heating scan at 10 °C/min of collagen (red line), gelatine A and B (black line), hide-derived glues (green line), bone-derived glues (blue line)

**Table S1.** Values of enthalpy relaxation and the peak temperature calculated at each time point using an annealing temperature of 40 °C and 30 °C.

| **Annealing at 40 °C** | ***t*peak (°C)** | | | | **∆*H* (J/g)** | | | |
| --- | --- | --- | --- | --- | --- | --- | --- | --- |
| 3h | 6h | 12h | 24 h | 3h | 6h | 12h | 24 h |
| HP3 | 62.0 | 62.5 | 63.1 | 63.5 | 5.2 | 5.5 | 6.4 | 6.8 |
| HP4 | 62.1 | 62.9 | 63.3 | 63.8 | 4.4 | 5.3 | 6.0 | 6.5 |
| HP6 | 59.0 | 59.6 | 60.0 | 60.4 | 5.5 | 6.2 | 6.6 | 7.0 |
| HP8 | 59.1 | 59.7 | 60.3 | 60.7 | 4.3 | 4.5 | 4.5 | 4.6 |
| BM5 | 61.3 | 62.3 | 63.0 | 63.5 | 5.5 | 6.6 | 7.3 | 7.9 |
| **Annealing at 30 °C** | ***t*peak (°C)** | | | | **∆*H* (J/g)** | | | |
| 3h | 6h | 12h | 24 h | 3h | 6h | 12h | 24 h |
| HP6 | 56.0 | 55.9 | 56.4 | 56.6 | 3.4 | 4.4 | 5.5 | 6.0 |

**Table S2a.** Glass transition temperature (*t*g) and associated heat capacity change (∆*Cp*) determined from the first and second heating scans, onset temperature (*t*onset), peak temperature (*t*peak), width signal expressed as the difference between the temperature at the start and end of the event (∆t), and enthalpy (∆*H*) calculated for the two signals observed in the first heating scan only.

|  |  |  | **Signal in the 50-80 °C temperature range** | | | | **Signal in the 80-110 °C temperature range** | | | |
| --- | --- | --- | --- | --- | --- | --- | --- | --- | --- | --- |
| **Sample** | ***t*g (°C)**  **(1 ramp/2ramp)** | **∆*C*p (J/K∙g)**  **(1 ramp/2ramp)** | ***t*onset**  **(°C)** | ***t*peak**  **(°C)** | **∆*t***  **(°C)** | **∆*H***  **(J/g)** | ***t*onset**  **(°C)** | ***t*peak**  **(°C)** | **∆*t***  **(°C)** | **∆*H***  **(J/g)** |
| Gelatine A | 68/59 | 0.65/0.53 | 68 | 72 | 21 | 6 | 90 | 95 | 34 | 11 |
| Gelatine B | 62/54 | 0.82/0.76 | 62 | 68 | 34 | 12 | 88 | 95 | 30 | 3 |
| HP3 | 63 ± 3/55.9 ± 0.6 | 1.006±0.006/0.71±0.04 | 64 ± 2 | 71.3 ± 0.6 | 33 ± 2 | 9.3 ± 0.9 | 81.1 ± 0.5 | 90 ± 3 | 25 ± 1 | 3.2 ± 0.7 |
| HP4* | 59/58 | 0.65/0.53 | 59 | 63 | 22 | 5 | 86 | 95 | 23 | 1 |
| HP6 | 67 ± 3/53 ± 2 | 1.1±0.1/0.7±0.2 | 70 ± 1 | 73 ± 2 | 20 ± 2 | 9 ± 1 | 87 ± 4 | 94 ± 1 | 28 ± 4 | 12 ± 1 |
| HP8 | 52 ± 2/52 ± 2 | 0.71 ± 0.06/0.6 ± 0.1 | 52 ± 1 | 65 ± 4 | 29 ± 5 | 8 ± 4 | 75 ± 1 | 88.5 ± 0.2 | 35 ± 3 | 5.6 ± 0.8 |
| HM1 | 73/62 | 0.9/0.5 | 73 | 79 | 31 | 7 | 94 | 100 | 29 | 9 |
| HM4 | 57.2 ± 0.9/51 ± 0.5 | 0.65 ± 0.06/0.59 ± 0.06 | 59.61 ± 0.03 | 66.0 ± 0.6 | 28 ± 3 | 11.1 ± 0.9 | / | / | / | / |
| HM5 | 66 ± 1/55 ± 1 | 0.9 ± 0.1/0.94 ± 0.06 | 66.2 ± 0.6 | 71.5 ± 0.3 | 21 ± 4 | 7 ± 2 | 87.6 ± 0.2 | 94.5 ± 0.4 | 34 ± 1 | 10 ± 1 |
| BM1 | 64 ± 2/56 ± 4 | 0.82 ± 0.06/0.67 ± 0.02 | 66 ± 3 | 69 ± 2 | 17 ± 2 | 8 ± 1 | 77 ± 1 | 88 ± 3 | 27 ± 2 | 7.0 ± 0.3 |
| BM2 | 67/57 | 0.8/0.5 | 69 | 72 | 19 | 8 | 82 | 95 | 27 | 4 |

*HP4 is the only sample showing another signal in the 50-80 °C temperature range with *t*onset = 71 °C, *t*peak = 73 °C, ∆*t* = 12 °C and ∆*H* = 0.9 J/g

**Table S2b.** Glass transition temperature (*t*g)and associated heat capacity change (∆*C*p)determined from the first and second heating scans, onset temperature (*t*onset), peak temperature (*t*peak), width signal expressed as the difference between the temperature at the start and end of the event (∆*t*), and enthalpy (∆*H*) calculated for the signals observed in the first heating scan for samples with several overlapping signals.

| **Sample** | ***t*g (°C)**  **(1 ramp/2ramp)** | **∆*C*p (W/g)**  **(1 ramp/2ramp)** | ***t*onset**  **(°C)** | ***t*peak1**  **(°C)** | ***t*peak2**  **(°C)** | ***t*peak3**  **(°C)** | ***t*peak4**  **(°C)** | **∆*t* (°C)** | **∆*H* (J/g)** |
| --- | --- | --- | --- | --- | --- | --- | --- | --- | --- |
| Collagen calf skin | 0.3/-2 | 1.2/1.3 | 43 | 52 | / | 82 | 109 | 85 | 18 |
| BM3 | 63/54 | 1.3/1.1 | 65 | 69 | 77 | 84 | 97 | 64 | 25 |
| BM4 | 62/52 | 1.0/0.9 | 64 | 68 | 76 | 88 | / | 49 | 22 |
| BM5 | 67/58 | 1.1/0.9 | 67 | 69 | 74 | / | 95 | 45 | 13 |

**Table S3.** Temperature (°C) and mass loss (% w/w) of each degradation step observed during the TGA carried out under nitrogen flow.

| **n° step** | **Temperature (°C)/mass loss (% w/w)** | | | | |
| --- | --- | --- | --- | --- | --- |
| **Collagen from calf skin** | **Gelatine (type A)** | **Gelatine (type B)** | **HP3** | **HP4** |
| **1**  **(Max, shoulder)** | *t*max = 38 °C | *t*max = 51 °C | *t*max = 45 °C  *t*s1 = 93 °C | *t*max = 81 °C* | *t*max = 47 °C |
| 5 % | 11 % | 13 % | 12 % | 12 % |
| **2** | 170 °C | / | / | / | / |
| 30 % | / | / | / | / |
| **3**  **(Max, shoulder)** | *t*max = 326 °C  *t*s2 = 390 °C | *t*max = 324 °C  *t*s4=297 °C  *t*s3 = 213 °C  *t*s2 = 404 °C | *t*max = 327 °C  *t*s4=295 °C  *t*s3 = 218 °C  *t*s2 = 378 °C | *t*max = 319 °C  *t*s3 = 215 °C  *t*s2 = 397 °C | *t*max = 319 °C  *t*s3 = 212 °C  *t*s2 = 363 °C |
| 51 % | 70 % | 71 % | 74 % | 71 % |
| **Residue at**  **900 °C** | **14 %** | **19 %** | **16 %** | **14 %** | **17 %** |
| **n° step** | **Temperature (°C)/mass loss (%)** | | | | |
| **HP6** | **HP8** | **HM1** | **HM4** | **HM5** |
| **1**  **(Max, shoulder)** | *t*max = 106 °C* | *t*max = 46 °C | *t*max = 49 °C | *t*max = 60 °C | *t*max = 51 °C  *t*s1 = 97 °C |
| 12 % | 11 % | 12 % | 10 % | 12 % |
| **2** | / | / | / | / | / |
| / | / | / | / | / |
| **3** | *t*max = 306 °C  *t*s3 = 234 °C  *t*s2 = 390 °C | *t*max = 310 °C  *t*s3 = 208 °C  *t*s2 = 375 °C | *t*max = 323 °C  *t*s3 = 218 °C  *t*s2 = 383 °C | *t*max = 309 °C  *t*s2 = 386 °C | *t*max = 307 °C  *t*s2 = 380 °C |
| 68 % | 72 % | 68 % | 73 % | 70 % |
| **Residue at**  **900 °C** | **20 %** | **17 %** | **20 %** | **16 %** | **18 %** |

* The reported temperature refers to a midpoint of the DTG signal, as the signal is broad, and no definite maximum can be determined.

| **n° step** | **Temperature (°C)/mass loss (%)** | | | | |
| --- | --- | --- | --- | --- | --- |
| **BM1** | **BM2** | **BM3** | **BM4** | **BM5** |
| **1**  **(Max, shoulder)** | *t*max = 52 °C | *t*max = 49 °C | *t*max = 45 °C | *t*max = 47 °C | *t*max = 46 °C |
| 11 % | 10 % | 11 % | 11 % | 11 % |
| **2** | / | / | / | / | / |
| / | / | / | / | / |
| **3**  **(Max, shoulder)** | *t*max = 322 °C  *t*s3 = 210 °C  *t*s2 = 375 °C | *t*max = 322 °C  *t*s3 = 201 °C  *t*s2 = 369 °C | *t*max = 317 °C  *t*s3 = 201 °C  *t*s2 = 360 °C | *t*max = 316 °C  *t*s3 = 208 °C  *t*s2 = 371 °C | *t*max = 318 °C  *t*s3 = 205 °C  *t*s2 = 370 °C |
| 70 % | 71 % | 73 % | 70 % | 69 % |
| **Residue at**  **900 °C** | **19 %** | **18 %** | **16 %** | **19 %** | **20 %** |

* The reported temperature refers to a midpoint of the DTG signal, as the signal is broad, and no definite maximum can be determined.

**Table S4.** Second mass loss peak temperature (*t*max), maximum degradation rate (DTGmax) and width of the collagen degradation peak (Δonset-endset) obtained from TG and DTG curves recorded under nitrogen flow.

| **Sample** | ***t*onset** | ***t*endset** | ***t*max**  **(°C)** | **DTGmax**  **(%/°C)** | **∆endset-onset**  **(°C)** |
| --- | --- | --- | --- | --- | --- |
| Collagen from calf skin | 299 | 394 | 326 | 0.43 | 95 |
| Gelatine type A | 287 | 375 | 324 | 0.57 | 88 |
| Gelatine type B | 274 | 383 | 327 | 0.55 | 109 |
| HP3 | 273 | 381 | 319 | 0.53 | 107 |
| HP4 | 280 | 374 | 319 | 0.62 | 94 |
| HP6 | 275 | 373 | 306 | 0.58 | 98 |
| HP8 | 275 | 371 | 310 | 0.59 | 95 |
| HM1 | 280 | 379 | 323 | 0.59 | 98 |
| HM4 | 279 | 364 | 309 | 0.68 | 85 |
| HM5 | 271 | 376 | 308 | 0.56 | 104 |
| BM1 | 275 | 379 | 322 | 0.58 | 104 |
| BM2 | 268 | 371 | 322 | 0.55 | 103 |
| BM3 | 271 | 365 | 317 | 0.58 | 94 |
| BM4 | 268 | 368 | 316 | 0.57 | 100 |
| BM5 | 270 | 371 | 318 | 0.59 | 101 |


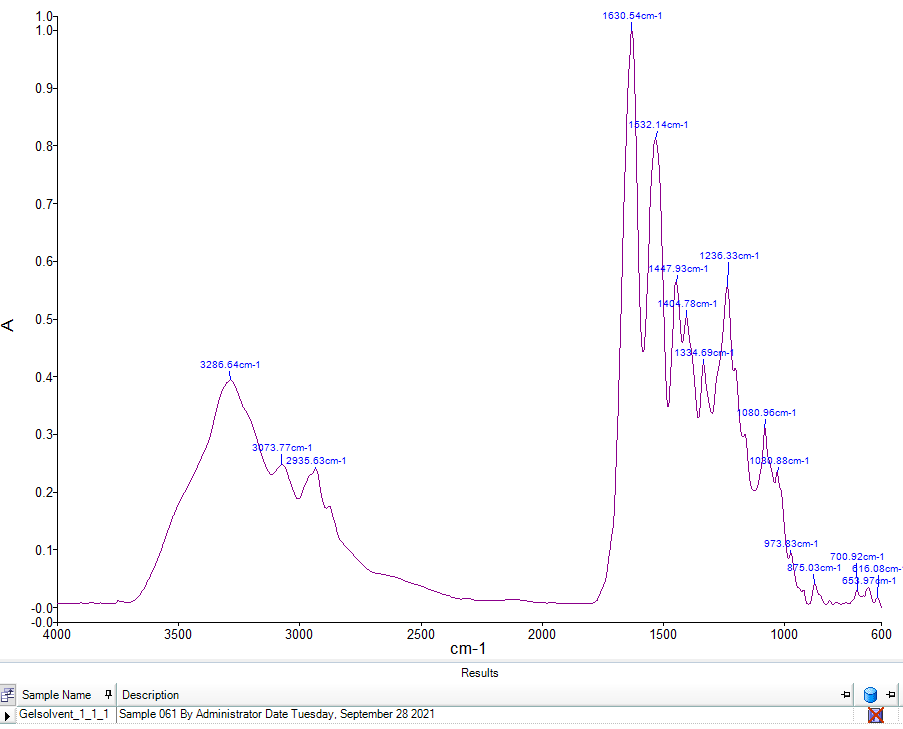


**Figure S1.** ATR-FTIR spectra of collage, gelatine A, gelatine B, HP3, HP4, HP6, HP8, HM1, HM4, HM5, BM1, BM2, BM3, BM4, BM5 samples.

**
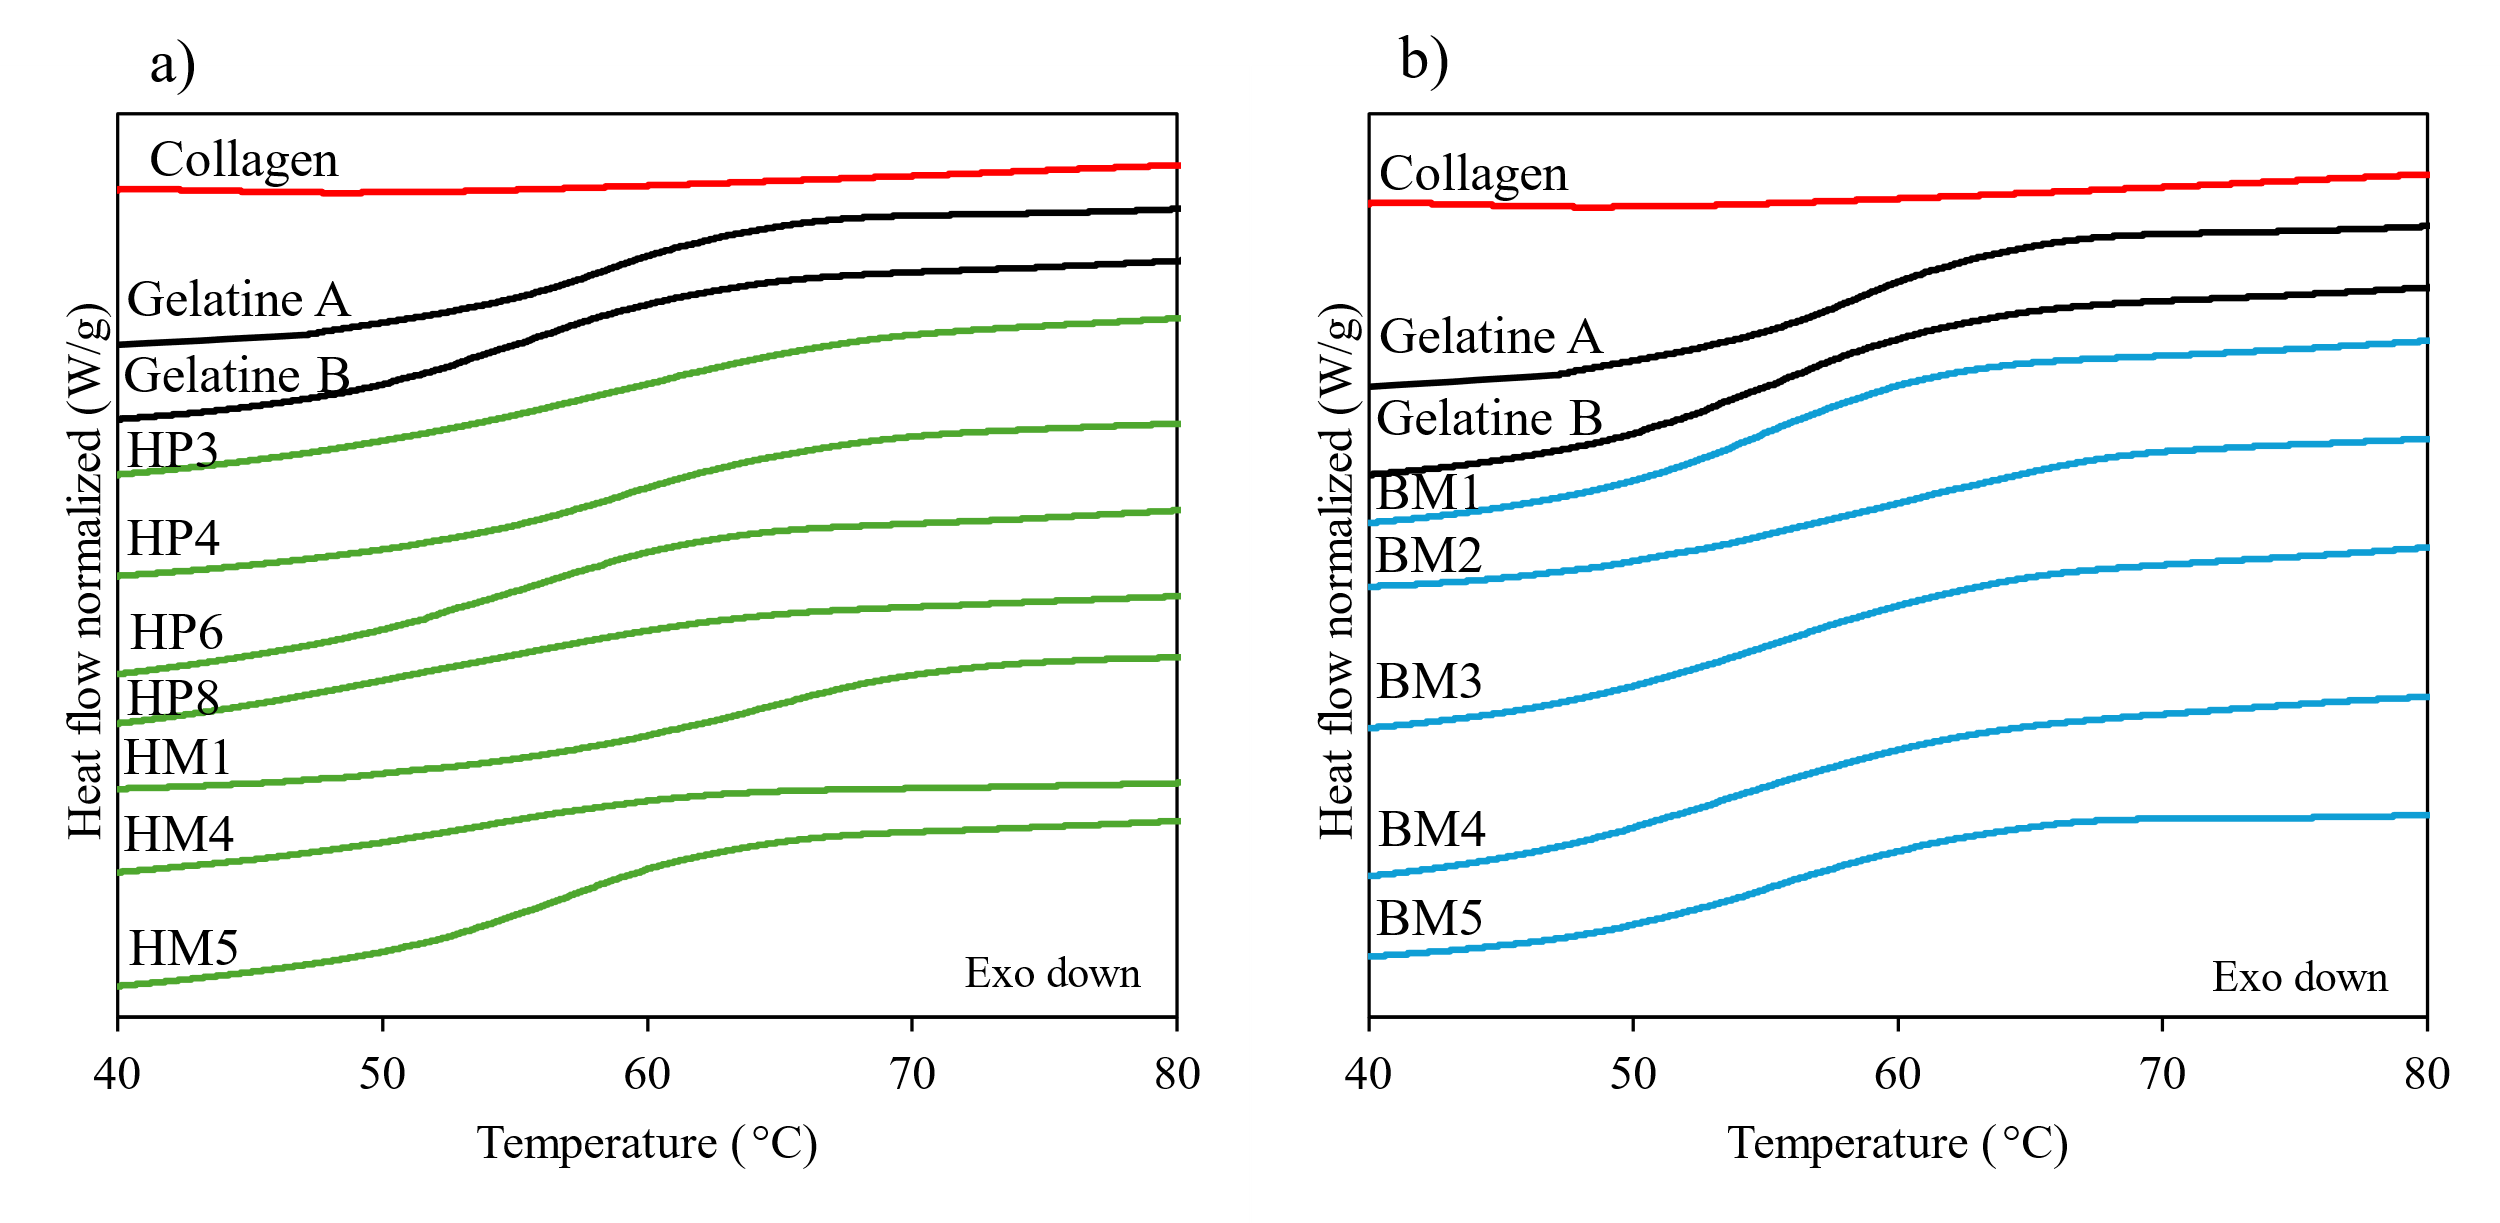
**

**Figure S2.** DSC curves obtained during the second heating scan at 10 °C/min of collagen (red line), gelatine A and B (black line), hide-derived glues (green line), bone-derived glues (blue line)
